# Supplementary material for: Suicide assistance in Germany: A protocol for a multi-perspective qualitative study to explore the current practice
Source: PubMed Central journal article supplement (PMC11642949; doi:10.1371/journal.pone.0311880), 2024-12-13
Supplement: pone.0311880.s002.pdf [file pone.0311880.s002.pdf]

## Human Participants Research Checklist

***Complete the following if your study involved human participants or human participants' data. These questions should be addressed for prospective and retrospective studies.***

**1. Did you obtain ethics approval for this study? Yes**

- If yes, please upload (file type "Other") the original approval document you received from your ethics committee. If the original document is in another language, please also provide an English translation.

**Uploaded**  N/A

- If you did not obtain ethical approval, please explain why this was not required below.

**2. If you prospectively recruited human participants for the study – for example, you conducted a clinical trial, distributed questionnaires, or obtained tissues, data or samples for the purposes of this study, please report in the Methods:**

- i. the day, month and year of the **start and end** of the recruitment period for this study.

***The recruitment period for this study will be from 01 April 2025 to 30 September 2027.***

- ii. whether participants provided informed consent, and if so, what type was obtained (for instance, written or verbal, and if verbal, how it was documented and witnessed). If your study included minors, state whether you obtained consent from parents or guardians. If the need for consent was waived by the ethics committee, please include this information.

***Potential participants will receive comprehensive oral and written information about the study and have to provide written informed consent to be eligible to participate in the project.***

If you are reporting a retrospective study of medical records or archived samples, please report in the Methods section:

- i. the day, month and year when the data were accessed for research purposes

**N/A**

- ii. whether authors had access to information that could identify individual participants during or after data collection

**N/A**
